# Supplementary material
Source: bioRxiv or medRxiv preprint supplement (http://medrxiv.org/highwire/filestream/79248/field_highwire_adjunct_files/0/2020.04.30.20086884-1.pdf)
Supplement: Supplementary file [file 2020.04.30.20086884-1.pdf]

| Jurisdiction         | R2 (Case Incidence) | R2 (CFR) | Jurisdiction   | R2 (Case Incidence) | R2 (CFR) |
|----------------------|---------------------|----------|----------------|---------------------|----------|
| Alabama              | 0.994               | 0.994    | Missouri       | 0.988               | 0.994    |
| Alaska               | 0.986               | 0.939    | Montana        | 0.981               | 0.939    |
| Arizona              | 0.987               | 0.998    | Nebraska       | 0.996               | 0.990    |
| Arkansas             | 0.997               | 0.990    | Nevada         | 0.988               | 0.994    |
| California           | 0.992               | 0.998    | New Hampshire  | 0.995               | 0.987    |
| Colorado             | 0.993               | 0.997    | New Jersey     | 0.989               | 0.999    |
| Connecticut          | 0.994               | 0.997    | New Mexico     | 0.996               | 0.991    |
| Delaware             | 0.996               | 0.992    | New York       | 0.99                | 0.992    |
| District of Columbia | 0.995               | 0.995    | North Carolina | 0.996               | 0.996    |
| Florida              | 0.987               | 0.998    | North Dakota   | 0.992               | 0.939    |
| Georgia              | 0.994               | 0.998    | Ohio           | 0.995               | 0.998    |
| Hawaii               | 0.981               | 0.939    | Oklahoma       | 0.985               | 0.994    |
| Idaho                | 0.964               | 0.979    | Oregon         | 0.992               | 0.989    |
| Illinois             | 0.994               | 0.997    | Pennsylvania   | 0.989               | 0.997    |
| Indiana              | 0.991               | 0.997    | Rhode Island   | 0.999               | 0.994    |
| Iowa                 | 0.998               | 0.995    | South Carolina | 0.988               | 0.995    |
| Kansas               | 0.995               | 0.996    | South Dakota   | 0.993               | 0.939    |
| Kentucky             | 0.997               | 0.987    | Tennessee      | 0.991               | 0.992    |
| Louisiana            | 0.966               | 0.997    | Texas          | 0.992               | 0.999    |
| Maine                | 0.993               | 0.990    | Utah           | 0.991               | 0.977    |
| Maryland             | 0.993               | 0.991    | Vermont        | 0.978               | 0.937    |
| Massachusetts        | 0.995               | 0.997    | Virginia       | 0.997               | 0.996    |
| Michigan             | 0.981               | 0.998    | Washington     | 0.979               | 0.998    |
| Minnesota            | 0.999               | 0.996    | West Virginia  | 0.989               | 0.986    |
| Mississippi          | 0.998               | 0.997    | Wisconsin      | 0.993               | 0.996    |
|                      |                     |          | Wyoming        | 0.985               | 0.939    |

**S1 Table Goodness of fit** Goodness of fit for both the CFR and case incidence model. This shows excellent fit between the model and data.
